# Supplementary material
Source: PubMed Central journal article supplement (PMC5515078)
Supplement: NIHMS874661-supplement-supplement_1.pdf [file NIHMS874661-supplement-supplement_1.pdf]

Supplementary information

1. Table S1 Cross validation results from confusion matrix from 2013 DA at Mt. Vernon.
2. Table S2 Cross validation results from confusion matrix from 2014 DA at Mountain Grove.

**Table S1. Cross validation results from confusion matrix from 2013 DA at Mt. Vernon.**

| From \ To  | Adams II | Bob Gordon | Wyldeewood | Total | % correct |
|------------|----------|------------|------------|-------|-----------|
| Adams II   | 14       | 0          | 0          | 14    | 100.00%   |
| Bob Gordon | 1        | 13         | 0          | 14    | 92.85%    |
| Wyldeewood | 0        | 2          | 4          | 6     | 66.67%    |
| Total      | 15       | 15         | 4          | 34    | 86.51%    |

**Table S2. Cross validation results from confusion matrix from 2014 DA at Mountain Grove.**

| From \ To  | Adams II | Bob Gordon | Wyldeewood | Total | % correct |
|------------|----------|------------|------------|-------|-----------|
| Adams II   | 4        | 0          | 1          | 5     | 80.00%    |
| Bob Gordon | 0        | 9          | 0          | 9     | 100.00%   |
| Wyldeewood | 0        | 2          | 8          | 10    | 80.00%    |
| Total      | 4        | 11         | 9          | 24    | 86.67%    |
